# Supplementary material
Source: PubMed Central journal article supplement (PMC10077044)
Supplement: ajcr0013-0727-f14.pdf [file ajcr0013-0727-f14.pdf]

## LUAD Biomarkers

**Table S1.** Row list of the LUAD-associated hub genes extracted from the previous studies

| Dataset                                                                         | Name of hub genes                                                                                                                            | No. hub genes | Reference |
|---------------------------------------------------------------------------------|----------------------------------------------------------------------------------------------------------------------------------------------|---------------|-----------|
| GSE118370                                                                       | ADCY4, S1PR1, FPR2, PPBP, NMU, PF4, and GCG                                                                                                  | 07            | [155]     |
| GSE68465, GSE68571, GSE69405                                                    | CCNA2, CCNB1, CDC20, CDCA5, CDCA8, FEN1, KIF2C, KPNA2, MCM6, NUSAP1, RACGAP1, RRM2, SPAG5, TOP2A, and TPX2                                   | 15            | [156]     |
| GSE40791                                                                        | CA4, PECAM1, DNAJB4, AGER, GIMAP6, C10orf54, and DOCK4                                                                                       | 7             | [157]     |
| GSE18842                                                                        | LRRK2, PECAM1, EPAS1, LDB2, and HOXA11-AS                                                                                                    | 5             | [158]     |
| GSE43458, GSE32863, GSE74706                                                    | PHACTR2, MSRB3, GHR, PLSCR4, EPB41L2, NPNT, and FBXO32                                                                                       | 7             | [159]     |
| GSE10072                                                                        | IL6, MMP9, EDN1, FOS, CDK1, CDH1, BIRC5, VWF, UBE2C, CDKN3, CDKN2A, CD34, AURKA, CCNB2, and EGR1                                             | 15            | [160]     |
| GSE33532, GSE29013                                                              | UBE2T, PBK, MELK, TNNC1, CCNB1, RRM2, CDK1, TOP2A, TPPX2, and UBE2C                                                                          | 10            | [161]     |
| GSE13213                                                                        | INS, LPL, HPGDS, DGAT1, UGT1A6, and CYP2C9                                                                                                   | 6             | [162]     |
| GSE7670, GSE10072, GSE31547                                                     | UBE2C, TOP2A, RRM2, CDC20, CCNB2, KIAA0101, BUB1B, TPX2, PRC1, and CDK1                                                                      | 10            | [163]     |
| GSE7670, GSE10072, GSE32863                                                     | CEACAM5, NQO1, LCN2, CDH1, KRT8, EPCAM, ELF3, KRT19, DCN, SERPING1, GNG11, CXCL12 and CAV1                                                   | 13            | [164]     |
| GSE118370, GSE136043, GSE140797                                                 | DCY8, ADRB2, CALCA, GCG, GNGT1, and NPSR1                                                                                                    | 06            | [165]     |
| GSE32863, GSE7670, GSE40791, GSE63459, GSE75037, GSE85841, GSE116959, GSE118370 | <i>CDH5, PECAM1, VWF, CLDN5, COL1A1, MMP9, SPP1, and IL6</i>                                                                                 | 08            | [166]     |
| GSE32863, GSE75037                                                              | UBB, RAC1, ITGB1, SRC, C3, IL6, CDC20, EGFR, UBE2C, TIMP1, GNG11, CXCL12, GAS6, P4HB, CXCR4, FPR1, ADRB2, LYZ, and MMP9                      | 19            | [167]     |
| GSE118370, GSE85841, GSE43458, GSE32863                                         | SPP1, OCIAD2, ETV4, TOP2A, COL10A, PROM2, MMP11, UBE2T, ABCC3, BAIAP2L1, FABP4, STX11, CAV1, FHL1, TEK, AGER, FMO2, CRYAB, GRK5, and TMEM100 | 20            | [168]     |
| GSE19188, GSE33532                                                              | DLGAP5, KIF11, RAD51AP1, CCNB1, AURKA, CDC6, OIP5, and NCAPG                                                                                 | 08            | [169]     |
| GSE85716, GSE32863, GSE116959                                                   | BIRC5, DLGAP5, CENPF, KIF4A, TOP2A, AURKA, and CCNA2                                                                                         | 07            | [170]     |
| GSE119004                                                                       | DK1, CCNB2, and CDC25A                                                                                                                       | 03            | [171]     |
| GSE43458                                                                        | IL6, VWF, CDH5, PECAM1, EDN1, BDNF, CAV1, SPP1, TEK, and SELE                                                                                | 10            | [172]     |
| GSE116959, GSE68571, GSE40791                                                   | VWF, SPP1, PECAM1, TOP2A, CDK1, UBE2C, and KIF23                                                                                             | 07            | [173]     |
| GSE6044, GSE118370                                                              | CDK1 and PLK1                                                                                                                                | 02            | [174]     |
| GSE43458, GSE62949, GSE68465, GSE115002, GSE116959, GSE118370                   | CBFA2T3, CR2, SEL1L3, TM6SF1, TSPAN32, ITGA6, MAPK11, RASA3, and TLR6                                                                        | 09            | [175]     |
| GSE40419, GSE66727, GSE86337, GSE57148                                          | TPX2, CENPF, BUB1, PLK1, KIF2C, AURKB, CDKN3, BUB1B, HMGA2, CDK1, ASPM, and CKS1B                                                            | 12            | [176]     |
| GSE75037                                                                        | CHRDL1 and SPARCL1                                                                                                                           | 02            | [177]     |
